# Supplementary material for: Measuring performance in allied health professional role substitution models of care: a clinician survey
Source: Springer Nature journal article supplement (doi:10.1186/s12913-024-10556-5), 2024-01-16
Supplement: MOESM1 [file 26632182]

# Measuring Performance in Allied Health Professional Role Substitution Models of Care- Clinician Survey

Thank you for your interest in this study about measuring performance in professional role substitution models of care.

You can read more about the study in the Participant Information and Consent Statement.

The survey is being conducted using RedCap which is based in the Australia. Information you provide on this survey will be transferred using this platform.

By completing this survey, you agree to this transfer of information, indicate that you understand the information supplied and you consent to taking part in the study.

Click "next page" to complete the survey.

[Attachment: "Participant Information and Consent Form (PICF).pdf"]

## Part A : Participant demographics

What is your age group?

- 18-25 years
- 26-35 years
- 36-45 years
- 46-55 years
- 56-65 years
- Over 65 years

How do you describe your gender?

- Male
- Female
- Non-Binary
- Another term (please specify)
- Prefer not to say

Please specify

\_\_\_\_\_

What is your allied health discipline?

- Audiologist
- Dietitian or nutritionist
- Exercise physiologist
- Occupational therapist
- Optometrist
- Pharmacist
- Physiotherapist
- Podiatrist
- Psychologist
- Radiographer /medical imaging technologists
- Social worker
- Speech pathologist
- Other (please specify)

Please specify

\_\_\_\_\_

---

How long have you worked as an allied health professional?

- < 5 years
- 6-10 years
- 11-15 years
- 16-25 years
- 26-30 years
- >30 years

---

What is your highest level of education?

- Bachelor's degree
- Graduate certificate
- Graduate diploma
- Master's degree
- Doctoral degree
- Other (please specify)

---

Please specify

---

**Participant workplace details**

Which hospital and health service do you predominantly work in Queensland?

- Cairns and Hinterland
- Central Queensland
- Central West
- Children's Health Queensland
- Darling Downs
- Gold Coast
- Mackay
- Metro North
- Metro South
- North West
- South West
- Sunshine Coast
- Torres and Cape
- Townsville
- West Moreton
- Wide Bay
- Other

Do you currently work or have you previously worked in a professional role substitution model of care?

- Yes
- No

How long have you worked in a professional substitution role?

- < 2 years
- 2-5 years
- 5-10 years
- >10 years

## Part B: Profession role substitution model of care details

What is the name of your professional role substitution model of care?

\_\_\_\_\_

(e.g. Physiotherapy vestibular primary contact clinic, Speech pathology-led ENT service, Dietitian first gastroenterology clinic, Pharmacist prescribing,)

What professional role substitution model are you interested in implementing?

\_\_\_\_\_

What year was the professional role substitution model of care implemented in your service?

\_\_\_\_\_

When are you planning to start the professional role substitution model of care?

- < 6 months  
 6-12 months  
 13-24 months  
 > 2 years

Which medical speciality is the professional substitution role aligned with?

- Cardiology  
 Emergency medicine  
 Endocrinology  
 Gastroenterology and hepatology  
 General medicine  
 General surgery  
 Mental health  
 Nephrology  
 Neurology  
 Neurosurgery  
 Obstetrics and Gynaecology  
 Oncology and hematology  
 Ophthalmology  
 Orthopaedics  
 Otolaryngology (ear, nose, throat, head, and neck)  
 Paediatrics  
 Persistent pain management  
 Plastic and reconstructive surgery  
 Respiratory and sleep medicine  
 Rheumatology  
 Urology  
 Vascular  
 Other(Please specify)

Which medical speciality would the professional substitution role be aligned with?

- Cardiology
- Emergency medicine
- Endocrinology
- Gastroenterology and hepatology
- General medicine
- General surgery
- Mental health
- Nephrology
- Neurology
- Neurosurgery
- Obstetrics and Gynaecology
- Oncology and hematology
- Ophthalmology
- Orthopaedics
- Otolaryngology (ear, nose, throat, head, and neck)
- Paediatrics
- Persistent pain management
- Plastic and reconstructive surgery
- Respiratory and sleep medicine
- Rheumatology
- Urology
- Vascular
- Other(Please specify)

Please specify

---

What clinical setting do you work in?(Tick all that apply)

- Outpatients
- Inpatients
- Emergency department
- Sub-acute
- Other(please specify)

Which clinical setting would the professional substitution role work in? (Tick all that apply)

- Outpatients
- Inpatients
- Emergency department
- Sub-acute and ambulatory care
- Other(please specify)

Please specify

---

What activities do you perform as part of your role in the professional role substitution model of care? (Please tick all that apply)

- Triage
- Taking a clinical history
- Performing physical examinations
- Ordering tests (e.g., blood tests , x-rays)
- Reporting tests (e.g., radiology images)
- Interpreting results of investigations
- Providing provisional diagnosis
- Patient management and treatment
- Patient education
- Prescribing or ordering medications
- Referrals to other health professionals
- Discharge patients to general practitioners(GP)
- Performing procedures (e.g., inserting nasogastric or tracheostomy tubes, injecting, or suturing)
- Other (Please specify)

---

What activities will/would you perform as part of your role in the professional role substitution model of care? (Please tick all that apply)

- Triage
- Taking a clinical history
- Performing physical examinations
- Ordering tests (e.g., blood tests , x-rays)
- Reporting tests (e.g., radiology images)
- Interpreting results of investigations
- Providing provisional diagnosis
- Patient management and treatment
- Patient education
- Prescribing or ordering medications
- Referrals to other health professionals
- Discharge patients to general practitioners(GP)
- Performing procedures (e.g., inserting nasogastric or tracheostomy tubes, injecting, or suturing)
- Other (Please specify)

---

Please specify

---

**Part C: Measuring Performance of Professional Role Substitution Models of Care- Clinician Attitudes**

To what extent do you agree with the following statement?

Measuring or evaluating the performance of a model of care is important.

- Strongly agree
- Agree
- Somewhat agree
- Somewhat disagree
- Disagree
- Strongly disagree

Measuring the performance of professional role substitution models of care is important because it can...  
(Tick up to 5 of the most important to you)

- Improve patient outcomes and care experiences
- Evaluate cost of service delivery
- Identify gaps and disparities in healthcare
- Improve efficiency and productivity in healthcare delivery
- Satisfy the regulatory requirements
- Ensure adherence to standards or benchmarks
- Support patients in making informed healthcare decisions
- Support governments, policy makers and health services to make evidence-based policies and investments
- Recognise and reward above-standard performance
- Secure ongoing data to monitor changes in quality of care over time
- Other (please specify)

CHECKED BOXES IS:

\_\_\_\_\_

Please specify

\_\_\_\_\_

The domains below have been used previously to categorise performance measures. Please read the information provided in the table to help you answer the questions that follow.

## Domain

### Definition

### Examples of indicators

#### 1) Effectiveness

Care, intervention, or action achieves desired outcomes

- o Generic and disease specific outcomes (e.g., short form 36, RAQoL)
- o Re-admissions, revisions, re-referrals

#### 2) Safety

The avoidance or reduction of actual or potential harm from healthcare delivery

- o Diagnostic accuracy, missed diagnosis
- o Guideline/protocol concordant care

#### 3) Appropriateness and responsiveness

Service is person centred and culturally appropriate

- o Patient experience and satisfaction
- o Referrer satisfaction

#### 4) Continuity of care and integration

Ability to provide uninterrupted care

- o Rates of appropriate follow up
- o Clinician or management continuity

#### 5) Accessibility and equity



**Timely access, with skills and resources appropriate to medical need**

- o Access metrics (e.g., wait-time)

- o Healthcare utilisation measures

**6) Cost, efficiency, productivity, and sustainability**

**Delivering care in a manner which maximises resources use and avoids waste**

- o Cost-effectiveness or benefit

- o Measures of willingness to pay

**How important is it to measure the following domains in professional role substitution models of care?**

|                                                       | Very important        | Important             | Somewhat important    | Not important         |
|-------------------------------------------------------|-----------------------|-----------------------|-----------------------|-----------------------|
| 1) Effectiveness                                      | <input type="radio"/> | <input type="radio"/> | <input type="radio"/> | <input type="radio"/> |
| 2) Safety                                             | <input type="radio"/> | <input type="radio"/> | <input type="radio"/> | <input type="radio"/> |
| 3) Appropriateness and responsiveness                 | <input type="radio"/> | <input type="radio"/> | <input type="radio"/> | <input type="radio"/> |
| 4) Continuity of care and integration                 | <input type="radio"/> | <input type="radio"/> | <input type="radio"/> | <input type="radio"/> |
| 5) Accessibility and equity                           | <input type="radio"/> | <input type="radio"/> | <input type="radio"/> | <input type="radio"/> |
| 6) Cost, efficiency, productivity, and sustainability | <input type="radio"/> | <input type="radio"/> | <input type="radio"/> | <input type="radio"/> |

**Part D: Measuring performance in practice**

With the professional role substitution model of care in mind,

Do you measure performance in this service?

Yes  No

---

Do you currently measure performance in your role?

Yes  No

---

Do you use a framework to measure performance in your service?

Yes  No

---

What is the name of the framework?

\_\_\_\_\_

Here again is the table of domains previously used to measure performance. Please use this as a reference to help you answer the following question. Domain

### **Definition**

### **Examples of indicators**

#### **1) Effectiveness**

**Care, intervention, or action achieves desired outcomes**

- o **Generic and disease specific outcomes (e.g., short form 36, RAQoL)**
- o **Re-admissions, revisions, re-referrals**

#### **2) Safety**

**The avoidance or reduction of actual or potential harm from healthcare delivery**

- o **Diagnostic accuracy, missed diagnosis**
- o **Guideline/protocol concordant care**

#### **3) Appropriateness and responsiveness**

**Service is person centred and culturally appropriate**

- o **Patient experience and satisfaction**
- o **Referrer satisfaction**

#### **4) Continuity of care and integration**

**Ability to provide uninterrupted care**

- o **Rates of appropriate follow up**
- o **Clinician or management continuity**

#### **5) Accessibility and equity**

## Timely access, with skills and resources appropriate to medical need

o Access metrics (e.g., wait-time)

o Healthcare utilisation measures

## 6) Cost, efficiency, productivity, and sustainability

Delivering care in a manner which maximises resources use and avoids waste

o Cost-effectiveness or benefit

o Measures of willingness to pay

### What domains do you measure in your service?

|                  | Yes                   | No                    |
|------------------|-----------------------|-----------------------|
| 1) Effectiveness | <input type="radio"/> | <input type="radio"/> |

Examples of the indicators you use to measure effectiveness

---

|           | Yes                   | No                    |
|-----------|-----------------------|-----------------------|
| 2) Safety | <input type="radio"/> | <input type="radio"/> |

Examples of the indicators you use to measure safety

---

|                                       | Yes                   | No                    |
|---------------------------------------|-----------------------|-----------------------|
| 3) Appropriateness and responsiveness | <input type="radio"/> | <input type="radio"/> |

Examples of the indicators you use to measure appropriateness and responsiveness

---

|                                        | Yes                   | No                    |
|----------------------------------------|-----------------------|-----------------------|
| 4) Continuity of care and integration. | <input type="radio"/> | <input type="radio"/> |

Examples of the indicators you use to measure continuity of care and integration

---

|                             | Yes                   | No                    |
|-----------------------------|-----------------------|-----------------------|
| 5) Accessibility and equity | <input type="radio"/> | <input type="radio"/> |

Examples of the indicators you use to measure access and equity

---

|                                                      | Yes                   | No                    |
|------------------------------------------------------|-----------------------|-----------------------|
| 6) Cost efficiency, productivity, and sustainability | <input type="radio"/> | <input type="radio"/> |

Examples of the indicators you use to measure cost efficiency , productivity and sustainability

---

7) Other (Please provide details of any other the indicators you measure)

---

How do you disseminate your findings? (Please tick all that apply)

- Local profession meetings (e.g. physiotherapy department meetings)
- Local specialty meetings (e.g. gastroenterology department meetings)
- Quality improvement reports
- Hospital and health service- wide platforms
- State-wide forums
- Conferences /seminars
- Peer reviewed publications
- Reports to funding bodies
- Internal evaluations
- External audits
- Other (please specify)

Please specify

---

## Part E: Barriers and enablers to measuring performance

Previously, the availability or lack of the following elements have been found to impact performance measurement in healthcare.

Please indicate whether each element has been an enabler (available) or barrier (lacks) in your service.

|                                                                              | Enabler               | Barrier               | Not applicable        |
|------------------------------------------------------------------------------|-----------------------|-----------------------|-----------------------|
| a) Dedicated resources (e.g. financial, human, time)                         | <input type="radio"/> | <input type="radio"/> | <input type="radio"/> |
| b) Integration of performance measurement in research or evaluation projects | <input type="radio"/> | <input type="radio"/> | <input type="radio"/> |
| c) Healthcare performance frameworks and/or policies                         | <input type="radio"/> | <input type="radio"/> | <input type="radio"/> |
| d) Medical leadership and support                                            | <input type="radio"/> | <input type="radio"/> | <input type="radio"/> |
| e) Allied health leadership and support                                      | <input type="radio"/> | <input type="radio"/> | <input type="radio"/> |
| f) Clinician drive                                                           | <input type="radio"/> | <input type="radio"/> | <input type="radio"/> |
| g) Consumer support and engagement                                           | <input type="radio"/> | <input type="radio"/> | <input type="radio"/> |
| h) Digital solutions ( e.g., data management systems)                        | <input type="radio"/> | <input type="radio"/> | <input type="radio"/> |
| i) Clear and well defined performance indicators and outcome measures        | <input type="radio"/> | <input type="radio"/> | <input type="radio"/> |
| j) Training and education to support measuring performance in healthcare     | <input type="radio"/> | <input type="radio"/> | <input type="radio"/> |
| k) Collaboration across sites                                                | <input type="radio"/> | <input type="radio"/> | <input type="radio"/> |

Other enablers (please specify)

---

Other barriers (please specify)

---

**Part F: Measuring performance in professional role substitution models of care - Future Strategies**

**If you were given a total of \$100 to spend on strategies to support measuring performance in professional role substitution models of care, how much would you allocate to each of these five (5) areas?**

- a) Development of frameworks with clear principles and processes
 

|  |                                                                                    |      |       |
|--|------------------------------------------------------------------------------------|------|-------|
|  | \$0                                                                                | \$50 | \$100 |
|  | 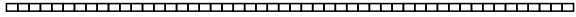 |      |       |
|  | (Place a mark on the scale above)                                                  |      |       |

---

- b) A tool kit with well developed resources
 

|  |                                                                                    |      |       |
|--|------------------------------------------------------------------------------------|------|-------|
|  | \$0                                                                                | \$50 | \$100 |
|  |  |      |       |
|  | (Place a mark on the scale above)                                                  |      |       |

---

- c) Digital solutions that facilitate systematic and standardised data collection, analysis and reporting.
 

|  |                                                                                    |      |       |
|--|------------------------------------------------------------------------------------|------|-------|
|  | \$0                                                                                | \$50 | \$100 |
|  |  |      |       |
|  | (Place a mark on the scale above)                                                  |      |       |

---

- d) Financial incentives
 

|  |                                                                                     |      |       |
|--|-------------------------------------------------------------------------------------|------|-------|
|  | \$0                                                                                 | \$50 | \$100 |
|  |  |      |       |
|  | (Place a mark on the scale above)                                                   |      |       |

---

- e) Education and training programs
 

|  |                                                                                      |      |       |
|--|--------------------------------------------------------------------------------------|------|-------|
|  | \$0                                                                                  | \$50 | \$100 |
|  |  |      |       |
|  | (Place a mark on the scale above)                                                    |      |       |

(Check total is: \$100)

Your current total is: \$[strategies\_total]

\*\*The total is less than \$100

\*\*The total is more than \$100

√ The total is equal to \$100

Do have any other comments before you finish this survey?

**Part G : Participation in future research on this topic and draw**

**Please note: If you choose to provide contact details, they will not be linked to your survey data, your anonymity will be maintained in reporting and your contact details will only be used by the research team for the purposes of inviting you to participate in future research or the draw. You may decline further participation at any time.**

There is an opportunity to provide further feedback to the researchers on this topic. Do you consent to be contacted to participate in face to face or telephone interviews?  Yes  No

Do you want to enter draw for your chance to win one of three (3) \$100 Coles-Myer gift cards?  Yes  No

Name \_\_\_\_\_

Email \_\_\_\_\_

Phone Number \_\_\_\_\_
